# Supplementary material
Source: Elsevier journal article supplement (https://www.sciencedirect.com/science/article/pii/S2531043720300283)

# The impact of exercise training on fatigue and fatigability in patients with Chronic Obstructive Pulmonary Disease: a Systematic Review and Meta-Analysis.

## Supplementary material

**Figure 1** SM Funnel plot with pseudo 95% confidence limits on fatigue item in CRQ scale.

**Abbreviations:** SMD, Standardized Mean Difference; se, standard error.

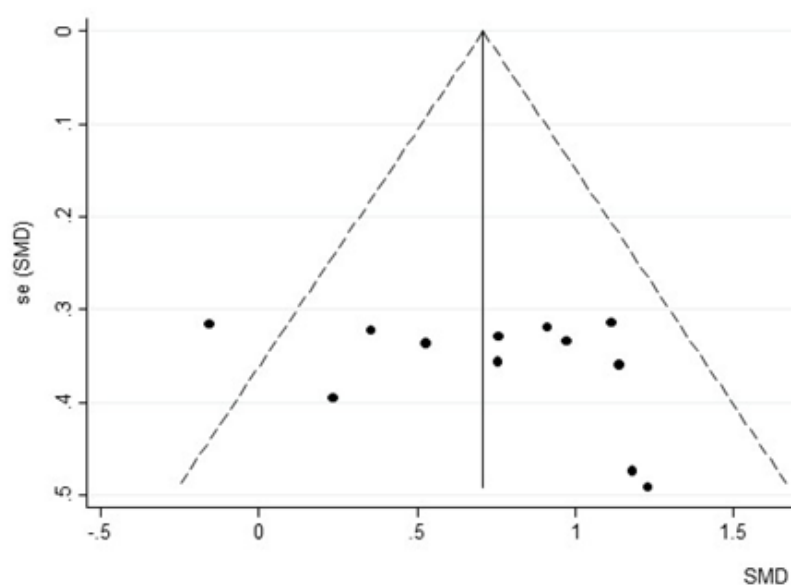

Supplement: mmc1 [file S2531043720300283:mmc1.pdf]
